# Supplementary material
Source: MDPI journal article supplement (https://www.mdpi.com/2073-4344/12/7/677)
Supplement: s1 [file s1]

## **Supplementary data**

### **Soot Oxidation in a Plasma-Catalytic Reactor: A Case Study of Zeolite-Supported Vanadium Catalysts**

**Xinbo Zhu <sup>1,\*</sup>, Hanpeng Wu <sup>1</sup>, Jianbin Luo <sup>1</sup>, Jin Liu <sup>1</sup>, Jiahao Yan <sup>1</sup>, Zijian Zhou <sup>2,\*</sup>, Zhengda Yang <sup>3</sup>, Ye Jiang <sup>3</sup>, Geng Chen <sup>1</sup>, Guohua Yang <sup>1</sup>**

<sup>1</sup> Faculty of Maritime and Transportation, Ningbo University, 315211 Ningbo, China;

<sup>2</sup> State Key Laboratory of Coal Combustion, Huazhong University of Science and Technology, Wuhan 430074, China

<sup>3</sup> College of New Energy, China University of Petroleum (East China), 66 West Changjiang Road, Qingdao 266580, China

\* Correspondence: zhuxinbo@nbu.edu.cn; zhouzj2012@hust.edu.cn

#### **Table of contents:**

- 1. Textural properties of the zeolite support**
- 2. XRD patterns of the zeolite support**
- 3. SEM images of the V/M catalysts**
- 4. XPS spectra of the zeolite supports**
- 5. Calculation of energy efficiency of the plasma-catalytic soot oxidation process**

**3 Figures, 1 Table and 1 Text**

## 1. Textural properties of the zeolite support

Table S1. Textural properties of the zeolite support.

| Samples   | Specific<br>surface area<br>( $\text{m}^2\cdot\text{g}^{-1}$ ) | Pore<br>volume<br>( $\text{cm}^3\cdot\text{g}^{-1}$ ) | Pore<br>diameter<br>(nm) | $\text{O}_{\text{ads}}/(\text{O}_{\text{ads}} + \text{O}_{\text{latt}})$<br>(%) |
|-----------|----------------------------------------------------------------|-------------------------------------------------------|--------------------------|---------------------------------------------------------------------------------|
| MCM-41    | 828                                                            | 0.80                                                  | 3.6                      | 58.3                                                                            |
| Mordenite | 397                                                            | 0.25                                                  | 2.4                      | 55.4                                                                            |
| USY       | 645                                                            | 0.44                                                  | 2.5                      | 54.7                                                                            |
| 5A        | 383                                                            | 0.34                                                  | 3.8                      | 52.9                                                                            |

## 2. SEM images of the V/M catalysts

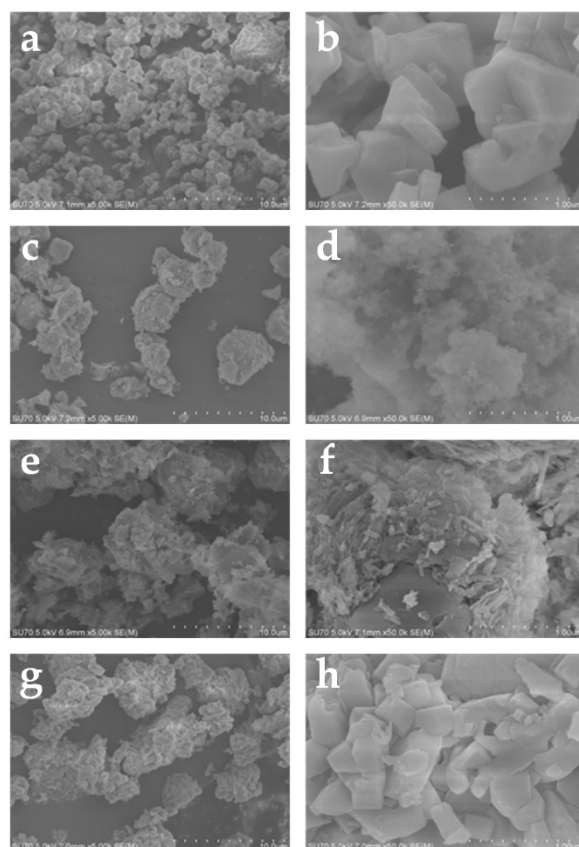

Figure S1. SEM images of the V/M catalysts: (a) and (b) V/MCM-41; (c) and (d) V/Mordenite; (e) and (f) V/USY; (g) and (h) V/5A. Left column: with a magnitude of 5.0 k, right column: with a magnitude of 50.0 k.

### 3. XRD patterns of the zeolite support

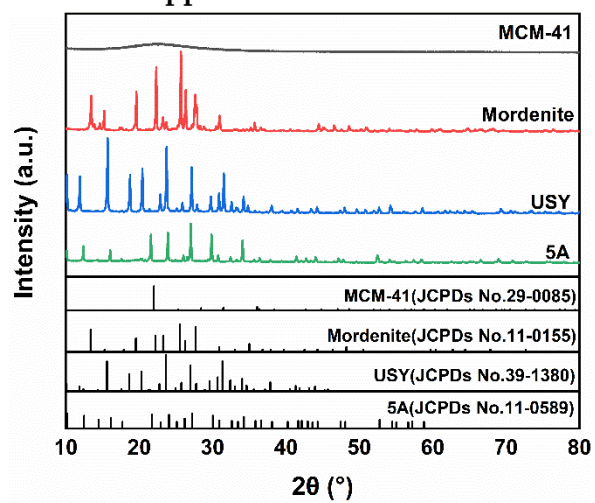

Figure S2. XRD patterns of the zeolite supports.

#### 4. XPS spectra of the zeolite supports

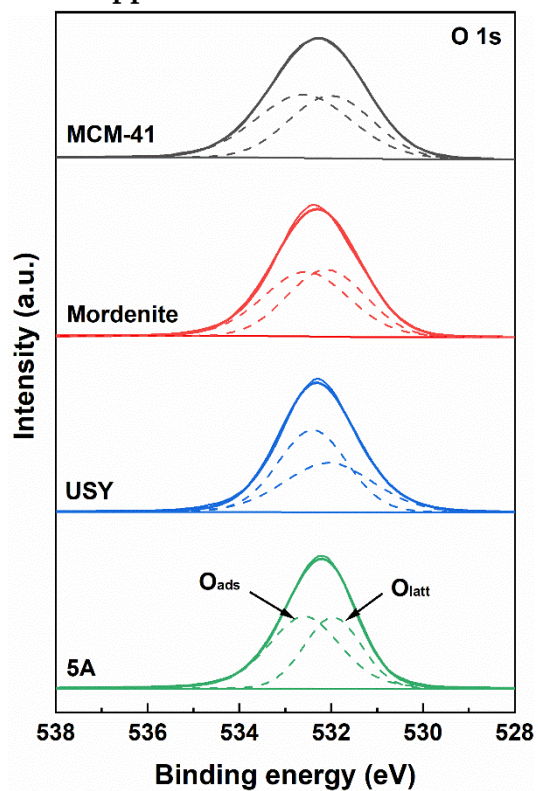

Figure S3. O 1s spectra of all zeolite supports.

## 5. Calculation of energy efficiency of the plasma-catalytic soot oxidation process

The energy efficiency of the plasma-catalytic soot oxidation process was defined as follows:

$$m_{soot} = \frac{G \times \int_0^t (C_{CO} + C_{CO_2}) dt}{V_m} \times M_C \quad (S1)$$

$$Energy\ efficiency\ (g \cdot kWh^{-1}) = \frac{m_{soot}}{P_d \times t} \quad (S2)$$

where  $m_{soot}$  is the weight of oxidized soot,  $G$  is the total flow rate,  $V_m$  is the gas molar volume under experiment condition,  $M_C$  is the molar mass of carbon,  $t$  is the duration for plasma-catalytic soot oxidation,  $P_d$  is the discharge power,  $C_{CO}$  and  $C_{CO_2}$  are the concentrations of outlet CO and CO<sub>2</sub>, respectively.
